# Supplementary material for: Optical trapping of nanoclusters formed in a temperature-responsive ionic liquid aqueous solution under focused near-infrared laser irradiation
Source: Royal Society of Chemistry journal article supplement (doi:10.1039/d4cp02363c), 2024-01-01
Supplement: d4cp02363c1.pdf [file d4cp02363c1.pdf]

## **Electronic Supplementary Information**

# Optical trapping of nanoclusters formed in a temperature-responsive ionic liquid aqueous solution under focused near-infrared laser irradiation

Maho Tanaka<sup>a</sup>, Rai Kobayashi<sup>a</sup>, Yasuyuki Tsuboi<sup>a</sup> and Ken-ichi Yuyama<sup>\*a</sup>

<sup>a</sup>Department of Chemistry, Graduate School of Science, Osaka Metropolitan University

### **S1. Optical setup**

A continuous-wave (cw) 1064 nm-laser beam (Laser Quantum, Oups1064-5W-HP) was used for optical tweezers. The laser was introduced into an inverted microscope (Olympus, IX73) and focused onto a sample solution through an objective lens (Olympus, Plan Fluor, oil, numerical aperture; 1.45). The sample solution was sandwiched with a glass slip and a whole slide glass, and its temperature was controlled with a thermal plate (Tokai Hit, TP-110R-100). The optical transmission images were captured with an imaging camera (HOZAN, L-835) under the illumination of white light from a halogen lamp. Fluorescence images and spectra were obtained under the irradiation of a cw 405 nm-laser (Backer & Hickl GmbH, BDS-SM-405-FBE). The emission was guided to a spectrograph (SOL instruments) and detected with a charge coupled device (CCD) detector (Andor). The same laser was used at the pulse mode for fluorescence lifetime measurements. The fluorescence was guided to a detector (MPD, SPD-100-CTC) and analysed with a time-correlated single photon counting module (Becker & Hickl GmbH, SPC-130MN).

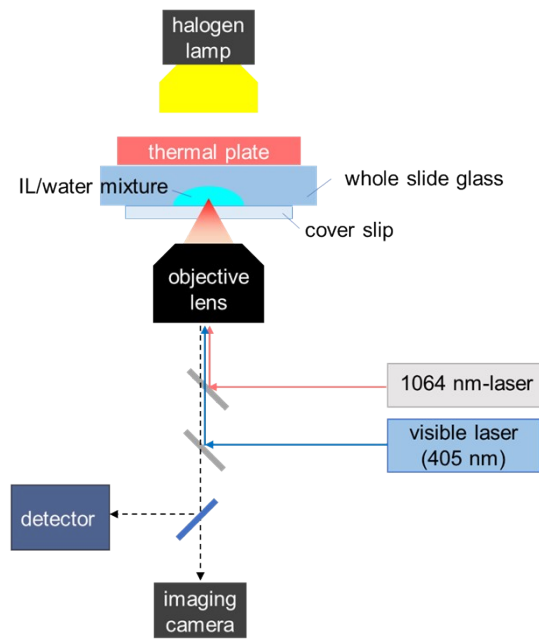

**Fig. S1** A schematic illustration of the optical setup used in this study.
